# Supplementary material
Source: PubMed Central journal article supplement (PMC2725767)

**Fig. S1 – Validation of hnRNA qPCR results**

**Relative RNA level**

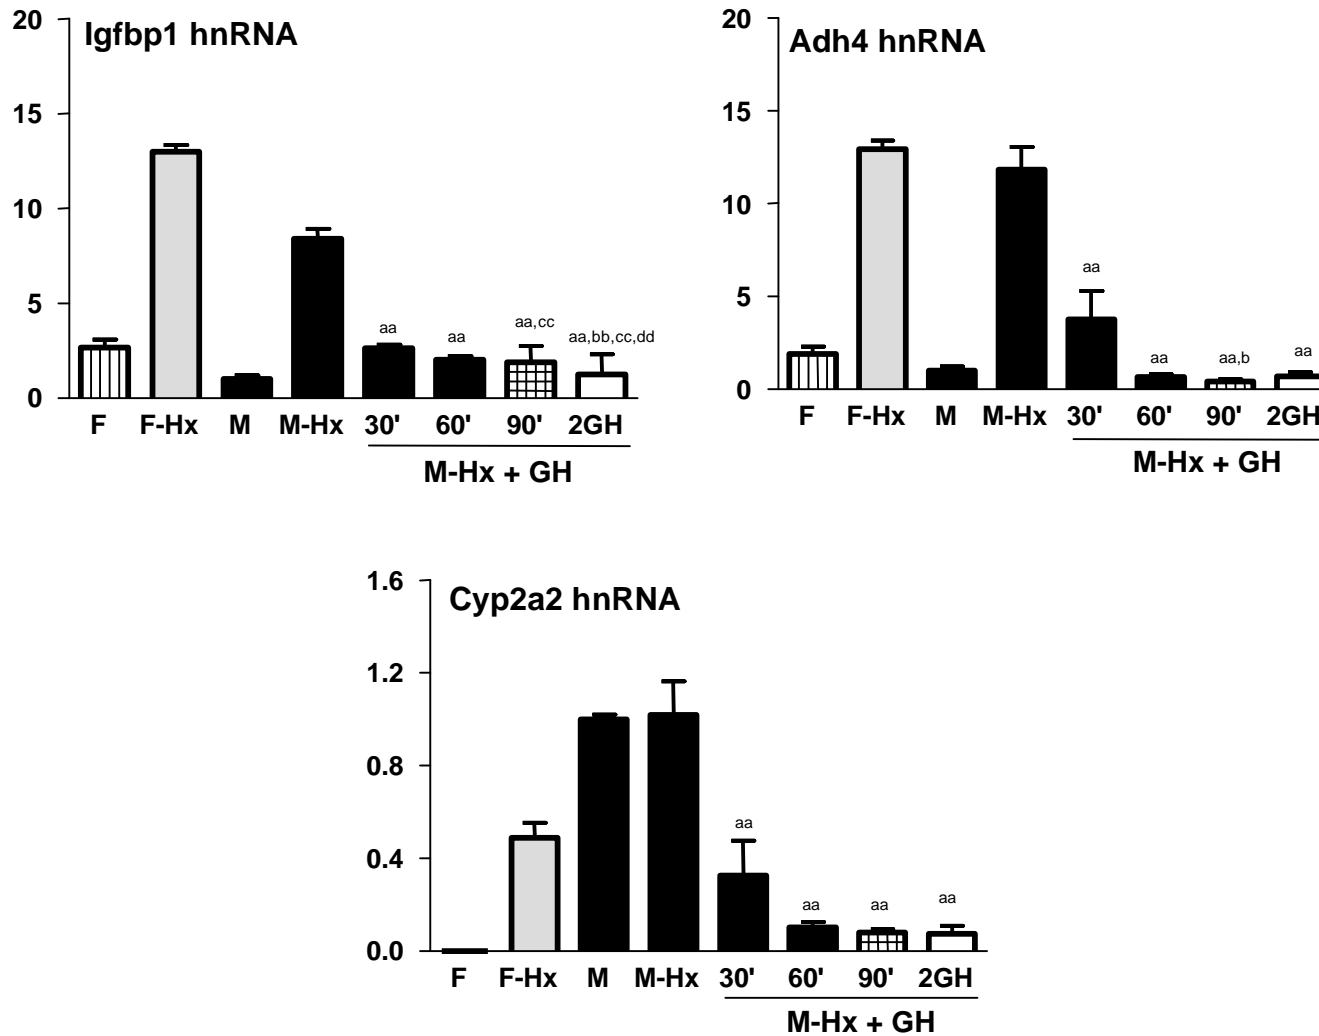

# Fig. S2 - Class I male genes

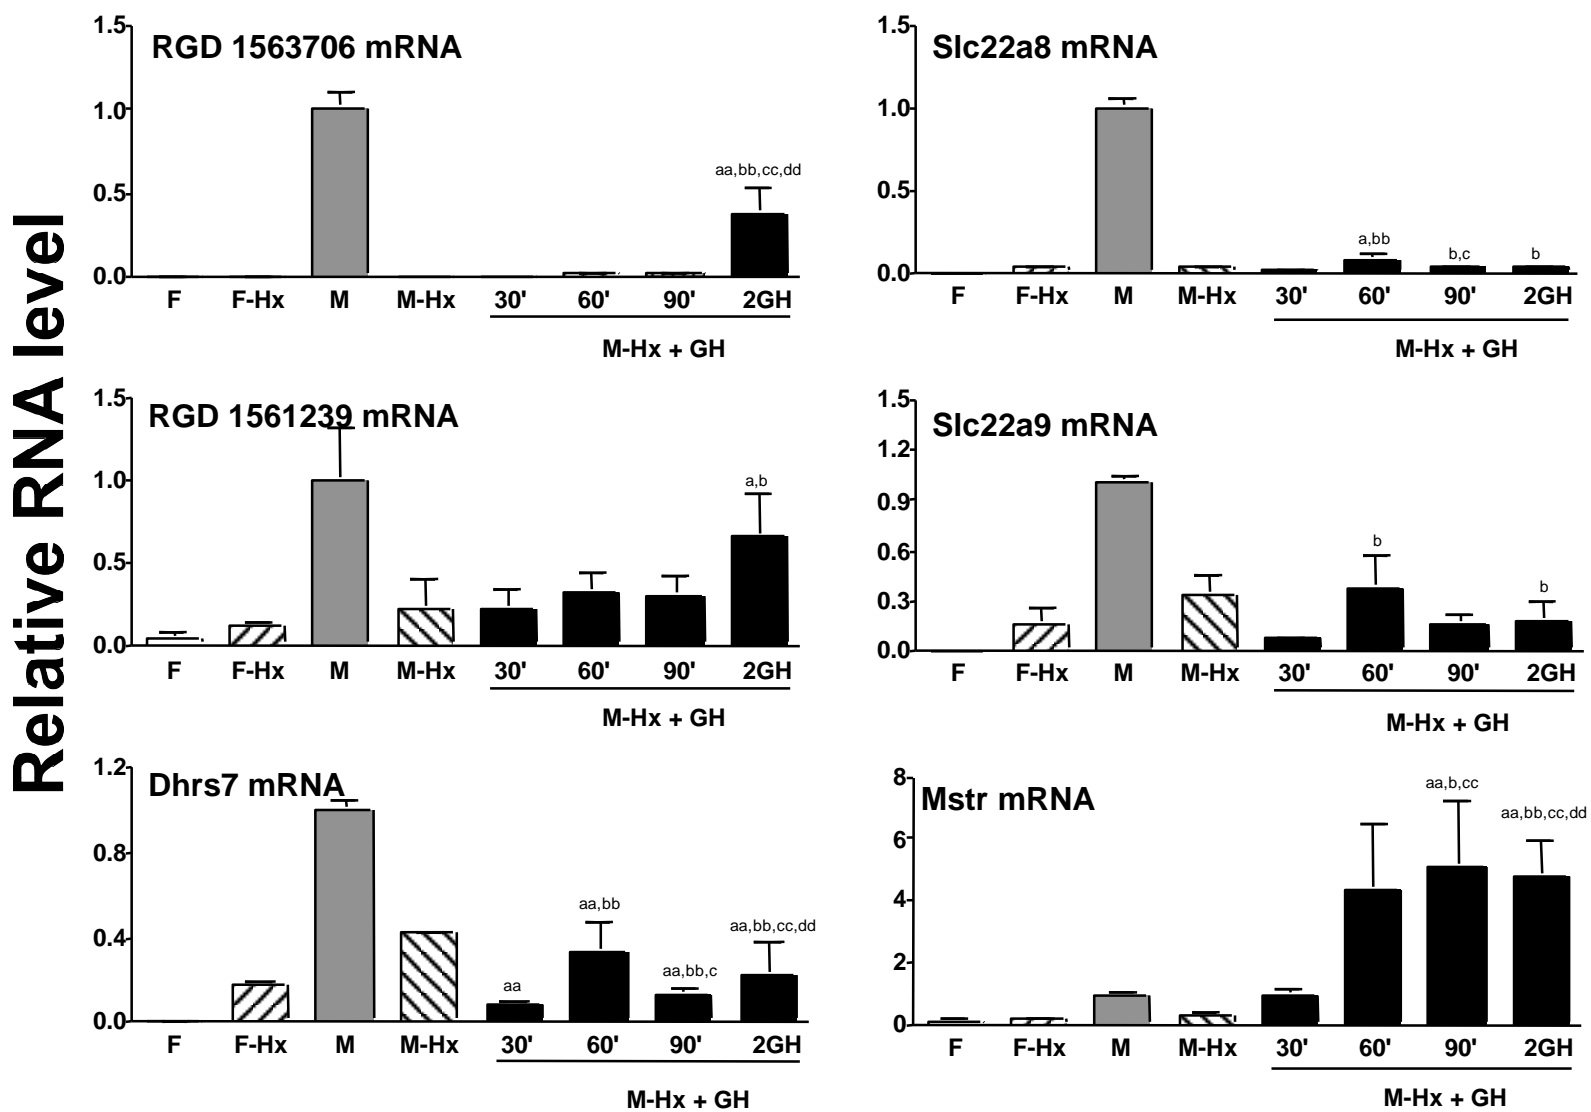

**Fig. S3 - Class II male genes**

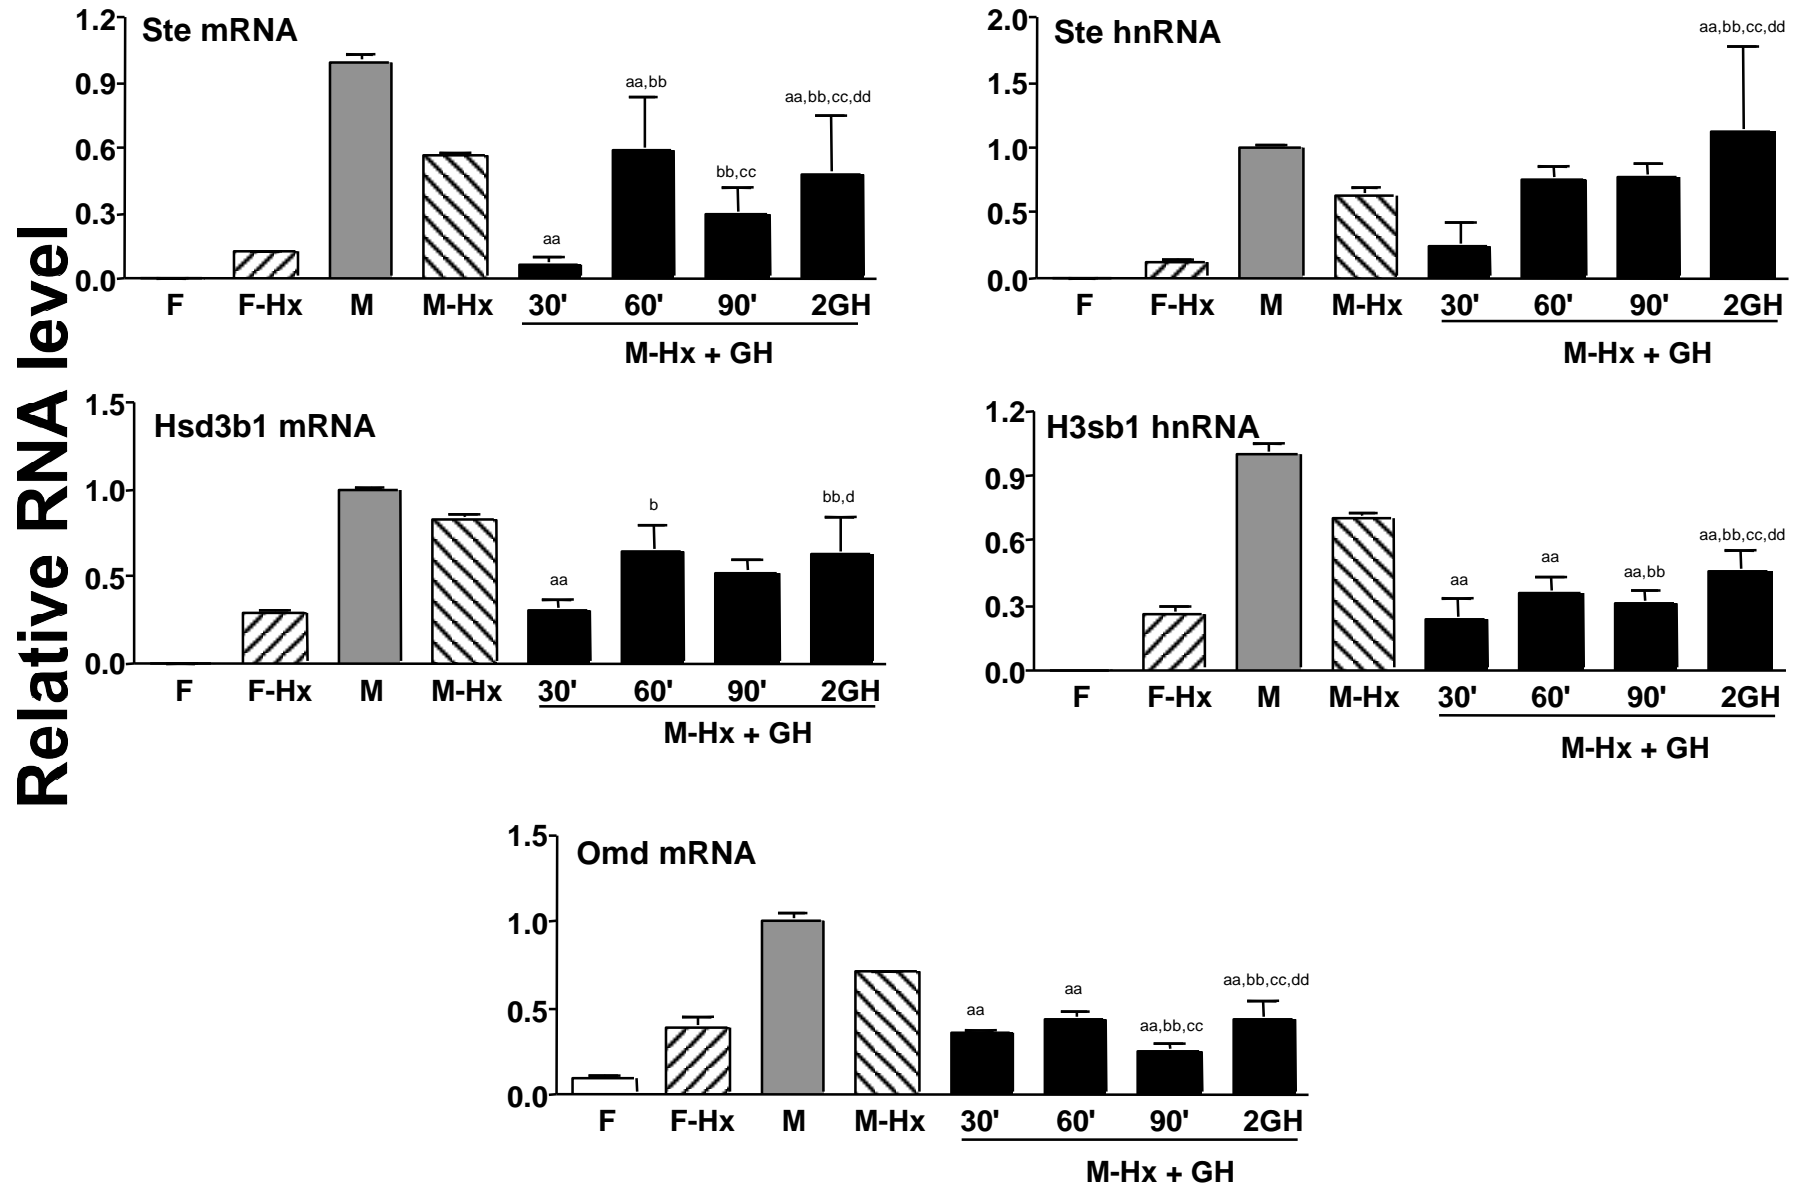

**Fig. S4 - Class I female genes**

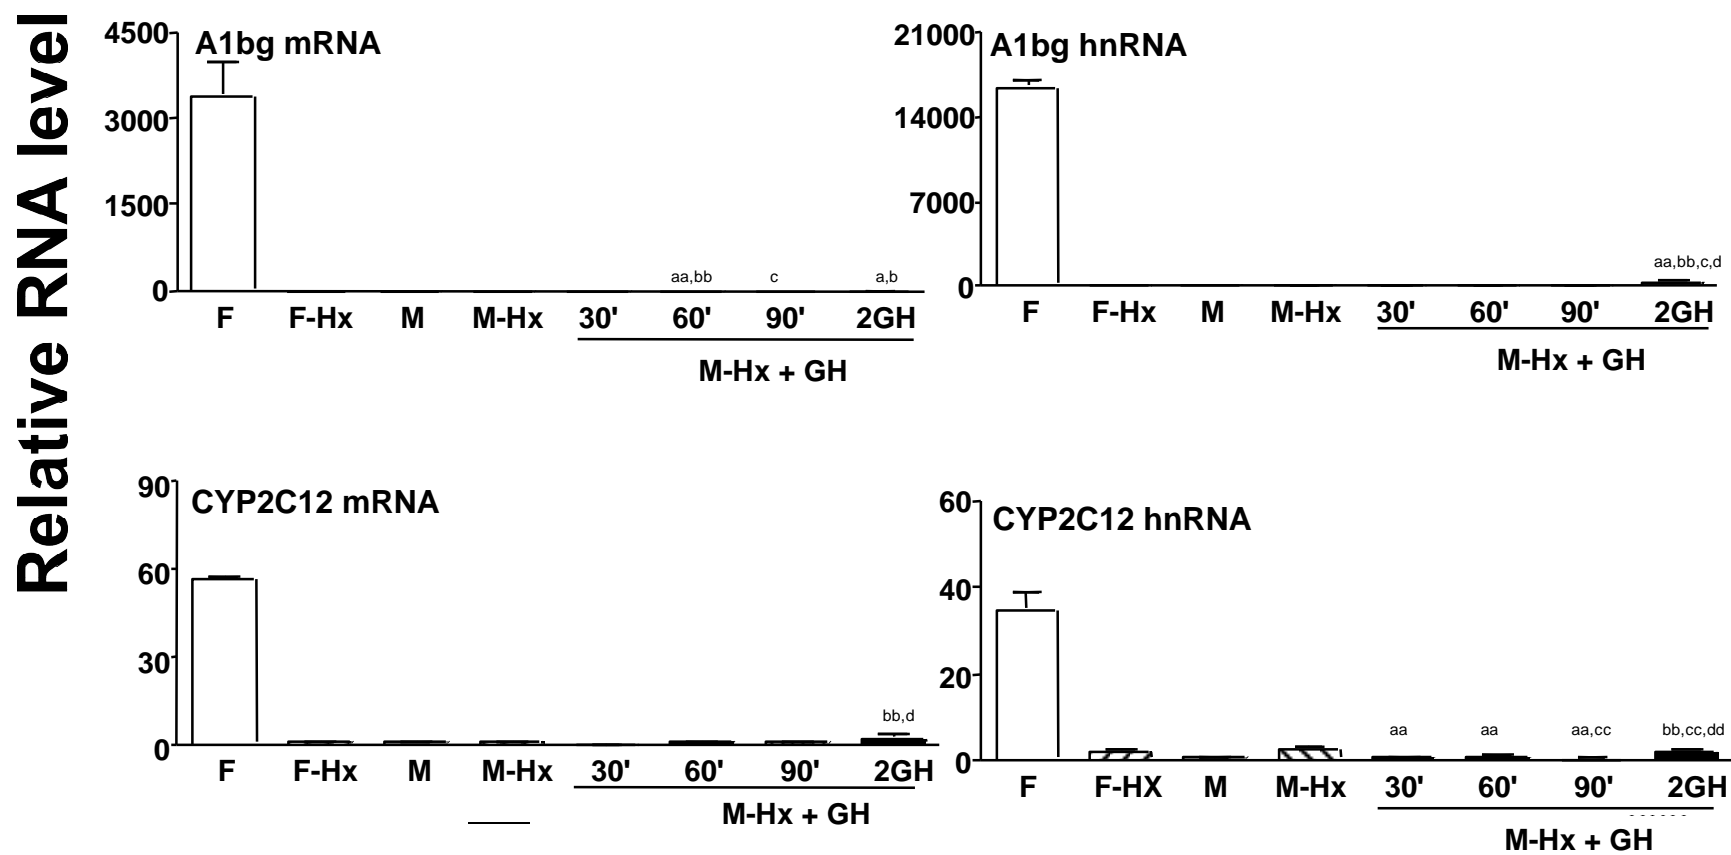

Supplement: me.2007-0549_2.pdf [file me.2007-0549_2.pdf]
